# Supplementary material for: Highly stable boron-modified hierarchical nanocrystalline ZSM-5 zeolite for the methanol to propylene reaction
Source: Royal Society of Chemistry journal article supplement (doi:10.1039/c4cy00376d), 2014-01-01
Supplement: c4cy00376d1.pdf [file c4cy00376d1.pdf]

## **Electronic Supplementary Information**

### **High stable boron-modified hierarchical nanocrystalline ZSM-5 zeolite for methanol to propylene reaction**

Zhijie Hu,<sup>‡</sup> Hongbin Zhang,<sup>‡</sup> Lei Wang, Hongxia Zhang, Yahong Zhang, Hualong  
Xu, Wei Shen\* and Yi Tang\*

Department of Chemistry, Shanghai Key Laboratory of Molecular Catalysis and  
Innovative Materials, Laboratory of Advanced Materials, and Collaborative  
Innovation Center of Chemistry for Energy Materials, Fudan University, Shanghai  
200433 (P.R. China).

\*Corresponding Author. Emails: yitang@fudan.edu.cn; wshen@fudan.edu.cn.

## Synthesis procedure:

### 1. Silicalite-1seed

The seed with crystal size of 200 nm was synthesized from clear solution method. The gel composition was 4.4TPAOH: 0.1Na<sub>2</sub>O 25SiO<sub>2</sub>: 756H<sub>2</sub>O: 100EtOH. Typically, the TEOS was added into the mixture aqueous solution of TPAOH, NaOH and H<sub>2</sub>O. Then, the mixture was transferred to a polypropylene bottle and hydrothermally treated at 373 K for 3 days. The obtained gel solution was directly used as the seed without any further treatment.

### 2. Conventional ZSM-5 (denoted as C-Z5)

In a typical run, Na<sub>2</sub>SiO<sub>3</sub>, NaAlO<sub>2</sub> and TPABr (tetrapropylammonium bromide) were dissolved in deionized water to prepare a precursor solution. Then, the pH was adjusted to 9.5-10 by dropwise adding sulfuric acid into the mixture. The obtained solution with the molar composition of 400SiO<sub>2</sub>: 1Al<sub>2</sub>O<sub>3</sub>: 120TPABr: 12000H<sub>2</sub>O was stirred for 5 h and then was transferred into a teflon-lined stainless-steel autoclave for crystallization at 180 °C for 48 h.

### 3. Hierarchical nanocrystalline ZSM-5 (denoted as N-Z5)

In a typical run, a starting aluminosilicate mixture with a molar ratio of 400SiO<sub>2</sub>: 1Al<sub>2</sub>O<sub>3</sub>: 60Na<sub>2</sub>O: 120KF: 40TPABr: 20000H<sub>2</sub>O was prepared using Al<sub>2</sub>(SO<sub>4</sub>)<sub>3</sub>•18H<sub>2</sub>O as alumina source, 40% colloidal silica as silica source. Thereafter, the pre-prepared silicalite-1 seed solution with crystal size of 200 nm was added under stirring. The addition quantity of seed typically equals to 7.0 wt% of total SiO<sub>2</sub> weight in starting gel. Then, the mixture was stirred at ambient temperature for 3 h and hydrothermally treated at 180 °C for 2 h.

### 4. Boron-modified conventional ZSM-5 (denoted as B-C-Z5)

In a typical run, Na<sub>2</sub>SiO<sub>3</sub>, NaAlO<sub>2</sub>, H<sub>3</sub>BO<sub>3</sub> and TPABr were dissolved in deionized water to prepare a precursor solution. Then, the pH was adjusted to 9.5-10 by dropwise adding sulfuric acid into the mixture. The obtained solution with the molar composition of 400SiO<sub>2</sub>: 1Al<sub>2</sub>O<sub>3</sub>: 1B<sub>2</sub>O<sub>3</sub>: 120TPABr: 12000H<sub>2</sub>O was stirred for 5 h and then was transferred into a teflon-lined stainless-steel autoclave for crystallization at 180 °C for 48 h.

### 5. Boron-modified hierarchical nanocrystalline ZSM-5 zeolite (denoted as B-N-Z5)

In a typical run, a starting aluminosilicate mixture with a molar ratio of 400SiO<sub>2</sub>: 1Al<sub>2</sub>O<sub>3</sub>: 1B<sub>2</sub>O<sub>3</sub>: 60Na<sub>2</sub>O: 120KF: 40TPABr: 20000H<sub>2</sub>O was prepared using Al<sub>2</sub>(SO<sub>4</sub>)<sub>3</sub>•18H<sub>2</sub>O as alumina source, 40% colloidal silica as silica source and H<sub>3</sub>BO<sub>3</sub> as boron source. Thereafter, the pre-prepared silicalite-1 seed solution with crystal size of 200 nm was added under stirring. The addition quantity of seed typically

equals to 7.0 wt% of total SiO<sub>2</sub> weight in starting gel. Then, the mixture was stirred at ambient temperature for 3 h and hydrothermally treated at 180 °C for 4 h.

Finally, the obtained four samples were separated by filtration, washed with deionized water, dried at 90 °C for 12 h and finally calcined under static air for 5 h at 550 °C. Then, these acidic samples were obtained by ion-exchange for three times with NH<sub>4</sub>NO<sub>3</sub> aqueous solution at 90 °C for 3 h and then calcined at 550 °C for 5 h.

Based on the novel “salt-aided seed-induced route” for synthesis of N-Z5 and B-N-Z5 with hierarchical nanocrystalline structure, the TPABr/ SiO<sub>2</sub> ratio of 0.3 can be reduced to lower than 0.1; the crystallization time of 48 h can be decrease to 2-4 h; the yield of products can be increased to >80% by the introduction of 7.0 wt% silicalite-1 seeds, compared with the synthesis of C-Z5 and B-C-Z5.

### **Characterization method:**

Scanning electron microscopy (SEM) images were recorded on a JEM-2100F microscope working at 10 kV acceleration voltage. Transmission electron microscopy (TEM) images were taken with a JEOL JEM-2001 microscope operated at 200 kV. The powder X-ray diffraction (XRD) patterns (2 $\theta$ , 5-50°) were obtained with a Bruker D8-Advanced diffractometer using Ni-filtered Cu-K $\alpha$  radiation. The elemental compositions of the catalyst samples were measured by ICP-AES using an IRIS Intrepid spectrometer. Solid-state magic angle spinning (MAS) NMR experiments were performed on a Bruker DSX 300 spectrometer at a rotation rate of 12 kHz. The <sup>27</sup>Al MAS NMR were obtained at a Lamor frequency of 78.2 MHz using a short RF pulse length of 1.0  $\mu$ s and a recycle delay of 2 s. The <sup>11</sup>B MAS NMR were obtained at a Lamor frequency of 96.3 MHz using a short RF pulse length of 2.0  $\mu$ s and a recycle delay of 0.5 s. BET surface area and pore volume were carried out with N<sub>2</sub> adsorption using Micrometrics ASAP 2020. Before analysis, all of samples were degassed in vacuum at 350 °C for 12 h. The acid amount and strength were measured by NH<sub>3</sub>-TPD using a Micromeritics AutoChem 2920 analyzer. The catalyst sample (0.1 g) was heated at 550 °C in a He flow for 3 h and then cooled to 80 °C. NH<sub>3</sub> adsorption was performed under a flow of 10 vol% NH<sub>3</sub>/He (30 ml min<sup>-1</sup>) for 1 h. The NH<sub>3</sub>-TPD was promptly started at a heating rate of 10 °C min<sup>-1</sup> from 80 to 600 °C.

### **Catalyst test:**

The performance of catalysts for methanol to propylene reaction was measured under atmospheric pressure at 733 K in an automatic fixed-bed micro-reactor with a quartz tube (I.D. = 8 mm). The catalyst particles (0.5 g, 40-60 mesh) were packed into the tube and activated with N<sub>2</sub> for 1 h. The weight hourly space velocity (WHSV) for methanol was 4.0 h<sup>-1</sup> with a methanol/H<sub>2</sub>O molar ratio of 1 : 3 unless noted. The total products were analyzed by an on-line gas chromatographs (Thermo ULTRA-GC) equipped with a flame ionization detector (FID) and CP-Pora PLOT-Q capillary

column (I.D.=0.32 mm and length =52.5 m). DME was considered as reactant and the carbon balance is above 95%.

## References information:

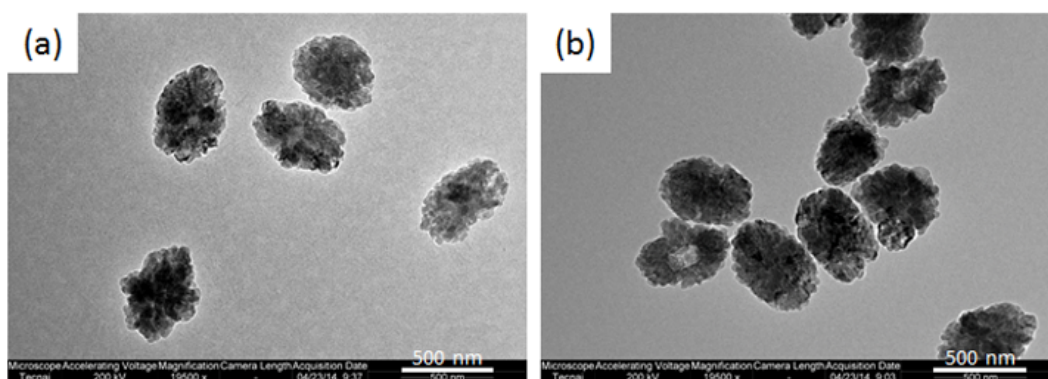

**Fig. S1** TEM images of calcined B-N-Z5 a) before and b) after the ultrasound treatment of 180 min.

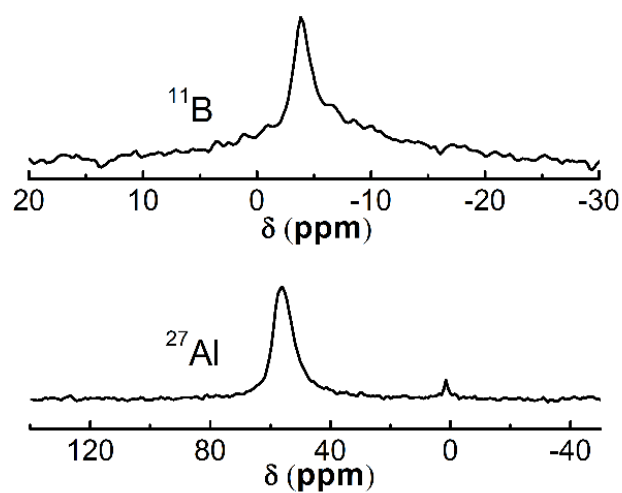

**Fig. S2**  $^{11}\text{B}$  and  $^{27}\text{Al}$  MAS NMR spectra of B-C-Z5.

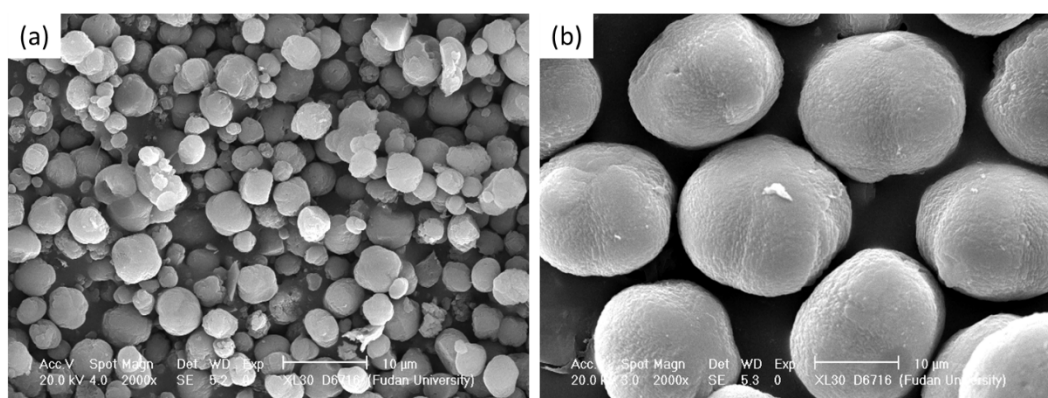

**Fig. S3** SEM images of (a) C-Z5 and (b) B-C-Z5.

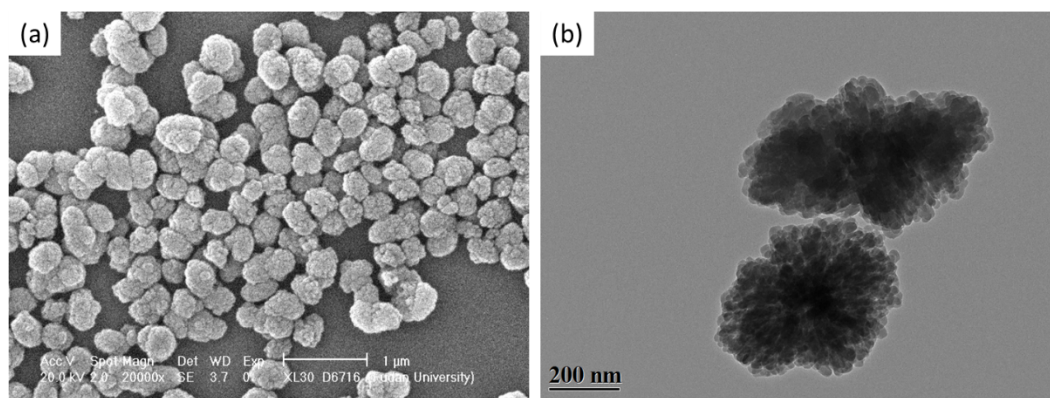

**Fig. S4** (a) SEM and (b) TEM images of N-Z5.

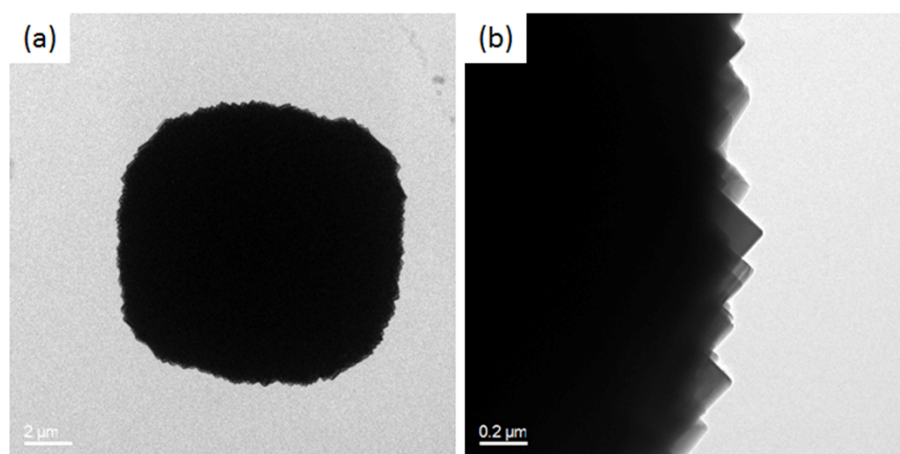

**Fig. S5** (a, b) TEM images of B-C-Z5.

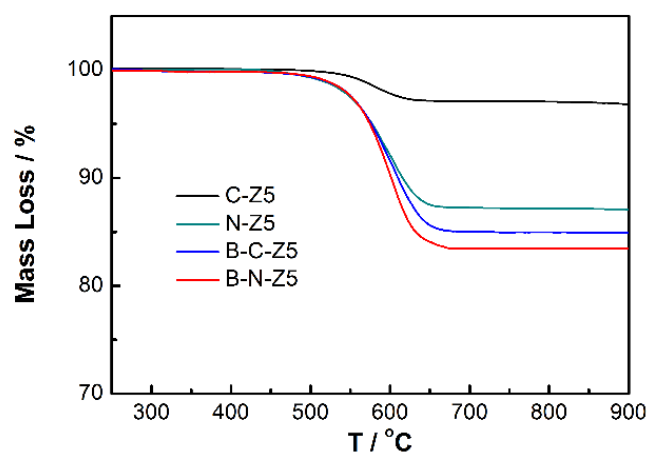

**Fig. S6** TG curves of the different coked catalysts after reaction.

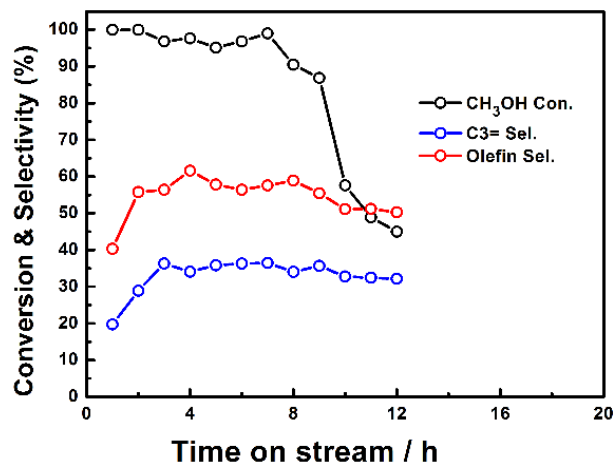

**Fig. S7** Conversion of methanol, selectivity of total olefin and propylene over zeolite B/N-Z5. Reaction conditions: WHSV = 10 h<sup>-1</sup>, T = 733 K, n(CH<sub>3</sub>OH) : n(H<sub>2</sub>O) = 1 : 3, P<sub>total</sub> = 1 atm.

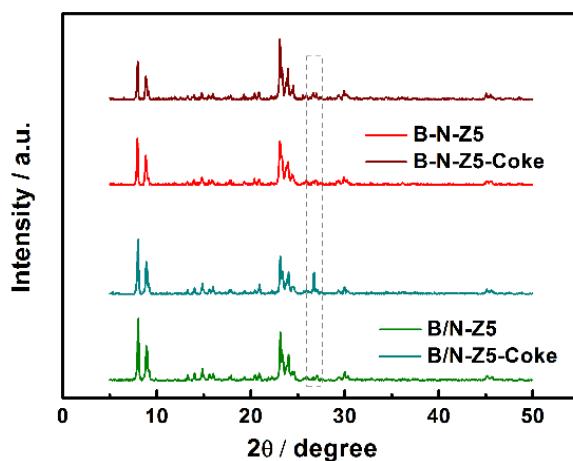

**Fig. S8** XRD patterns of B/N-Z5 and B-N-Z5 before reaction and B/N-Z5-Coke and B-N-Z5-Coke after reaction.

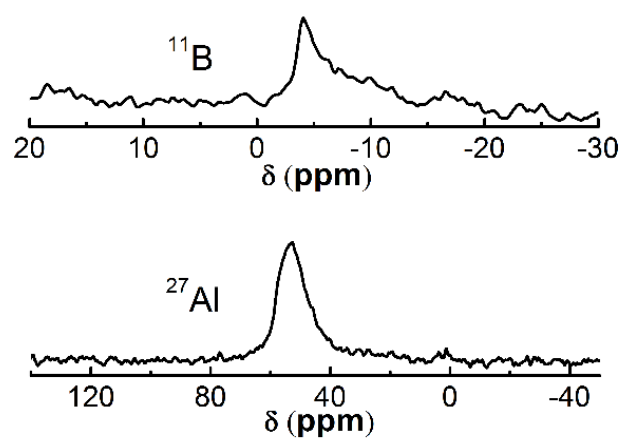

**Fig. S9**  $^{11}\text{B}$  and  $^{27}\text{Al}$  MAS NMR spectra of B-N-Z5 after reaction.
